# Supplementary material for: ∆9-Tetrahydrocannabinol Self-Administration Induces Cell-Type Specific Adaptations and cFOS Expression in the Nucleus Accumbens Core
Source: Research Square preprint supplement (doi:10.21203/rs.3.rs-864738/v1), 2021-09-27
Supplement: Supplementary file 1 [file bd9a022efccf7c159de05700.docx]

**Supplementary Figures:**

**
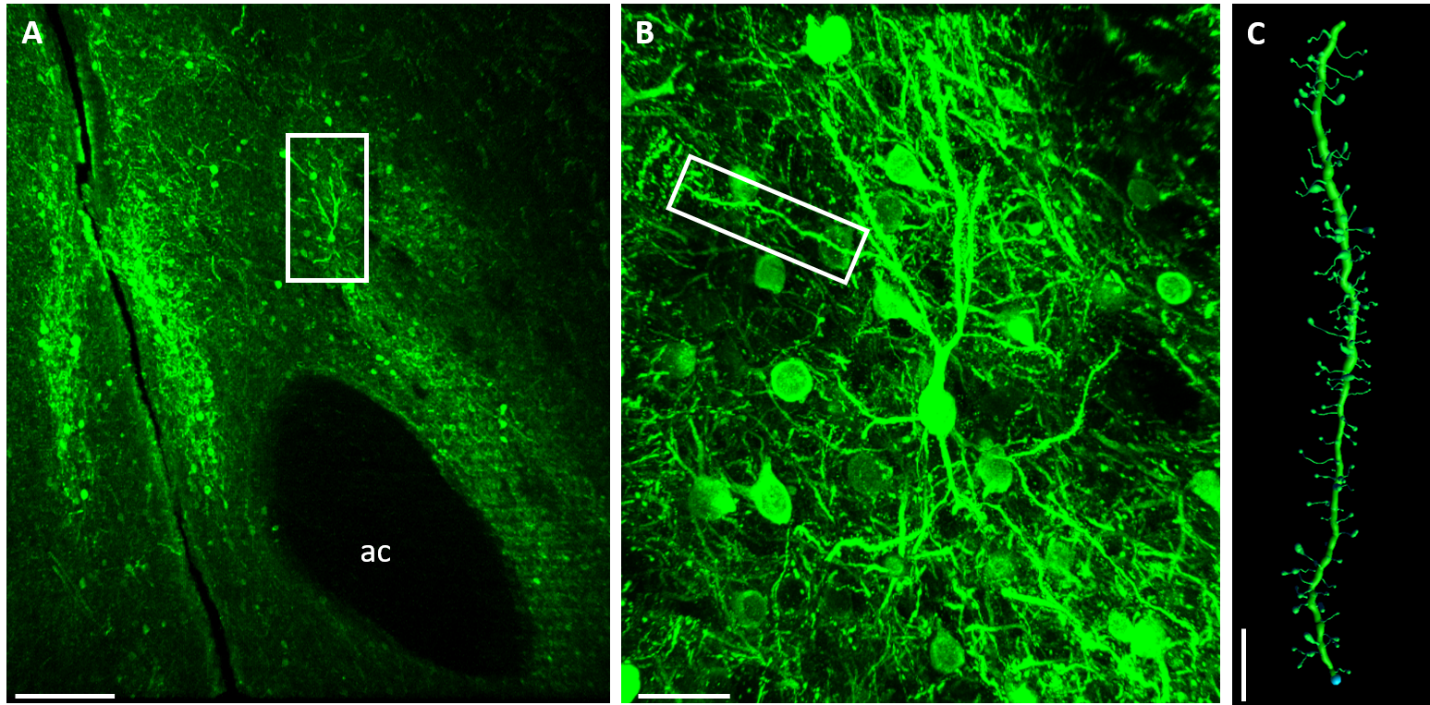
**

**Supplementary Figure 1.** Ruby2-smFP-Flag labeled neurons. Rendering and quantification of a confocal image of a virus-labeled, Ruby2-smFP-Flag filled dendrite segment from a D1-Cre MSN rat. **A)** Confocal image of Ruby2-Flag-fill neurons in the NAcore. Box identifies the dendrite rendered in panel C. Bar= 300μm. **B)** Magnification of Neuron and dendrite segment chosen for spine analysis Bar= 30μm. **C)** Respective filling of the chosen dendrite from B using the IMARIS module. Bar= 7μm.


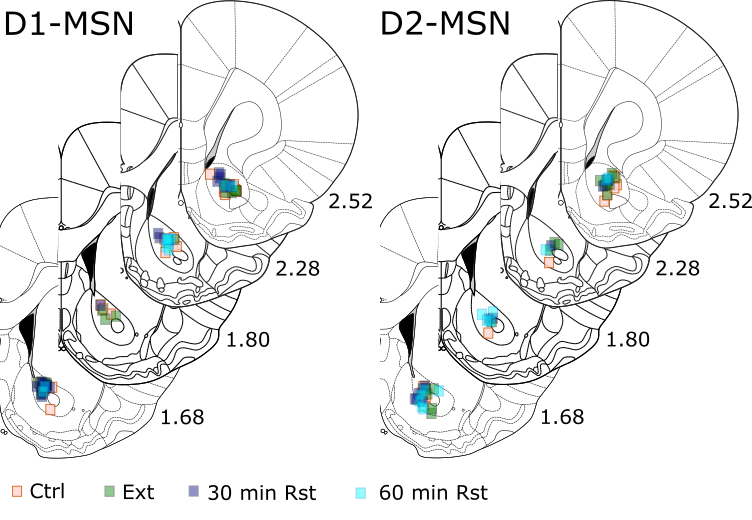


**Supplementary Figure 2.** Anatomical distribution of confocal images used for c-FOS quantification from D1 transgenic rats (left) and D2 transgenic rats (right). Different treatment groups are color coded (see legend).

**Supplementary Table 1 Shapiro-Wilk Normality tests**

| **Experiment** | **D1** | | | **D2** | | |  | | | |  | |  | | | | | |
| --- | --- | --- | --- | --- | --- | --- | --- | --- | --- | --- | --- | --- | --- | --- | --- | --- | --- | --- |
| **N** | **W** | **p** | **N** | **W** | **p** |  | |  | |  | |  | | |  | | |
| Figure 1C: avg. Infusions | 34 | 0.9121 | **0.0097** | 26 | 0.8816 | **0.0062** |  | |  | |  | |  | | |  | | |
| Figure 1 D: Reinstatement | 15 | 0.9188 | 0.1848 | 10 | 0.9164 | 0.3276 |  | | |  | |  | |  | | |  | | |
| **Experiment** | **Vehicle** | | | **Extinction** | | | **RST 30 mins** | | | | |  | | | | | |
| **N** | **W** | **p** | **N** | **W** | **p** | **N** | **W** | | **p** | |  | | |  | | |
| Figure 2B: D1-Spine heads | 21 | 0.9711 | 0.7569 | 24 | 0.9466 | 0.2284 | 23 | 0.9316 | | 0.1182 | |  | | |  | | |
| Figure 2B: D1-Spine Density | 21 | 0.9804 | 0.9314 | 24 | 0.9508 | 0.2822 | 23 | 0.9720 | | 0.7377 | |  | | |  | | |
| Figure 2E: sEPSC Amplitude | 9 | 0.9197 | 0.3898 | 10 | 0.9596 | 0.7482 | 14 | 0.8889 | | 0.0781 | |  | | |  | | |
| Figure 2E: sEPSC IEI | 9 | 0.6907 | **0.0002** | 10 | 0.9293 | 0.1890 | 14 | 0.7250 | | **0.0002** | |  | | |  | | |
| Figure 3B: D2-Spine heads | 22 | 0.9528 | 0.3584 | 23 | 0.9735 | 0.7722 | 15 | 0.9666 | | 0.8055 | |  | | |  | | |
| Figure 3B: D2-Spine Density | 22 | 0.9673 | 0.6487 | 23 | 0.9434 | 0.2120 | 15 | 0.9338 | | 0.3109 | |  | | |  | | |
| Figure 3E: sEPSC Amplitude | 13 | 0.9580 | 0.7226 | 15 | 0.9698 | 0.8553 | 11 | 0.9847 | | 0.9866 | |  | | |  | | |
| Figure 3E: sEPSC IEI | 13 | 0.9558 | 0.6888 | 15 | 0.8906 | 0.0685 | 11 | 0.9616 | | 0.7914 | |  | | |  | | |
| Figure 4A: D1-WIN | 7 | 0.7894 | **0.0321** | 7 | 0.9717 | 0.9102 | - | - | | - | |  | | |  | | |
| Figure 4B: D1-LFS Plasticity | 11 | 0.9408 | 0.5299 | 9 | 0.9560 | 0.7557 | 14 | 0.9559 | | 0.6551 | |  | | |  | | |
| Figure 4C: D2-WIN | 6 | 0.9279 | 0.5332 | 6 | 0.9763 | 0.9319 | - | - | | - | |  | | |  | | |
| Figure 4D: D2-LFS Plasticity | 8 | 0.8998 | 0.2879 | 11 | 0.9563 | 0.7253 | 9 | 0.9449 | | 0.6339 | |  | | |  | | |
| **Experiment** | **Vehicle** | | | **Extinction** | | | **RST 30 mins** | | | | | **RST 60 mins** | | | | | | | |
| **N** | **W** | **p** | **N** | **W** | **p** | **N** | **W** | | **p** | | **N** | | **W** | | | **P** | | |
| Figure 5C: Total cFOS | 42 | 0.9405 | **0.0296** | 35 | 0.9600 | 0.2288 | 33 | 0.9508 | | 0.1408 | | 27 | | 0.9448 | | | 0.1602 | | |
| Figure 5D: D1-cFOS overlap | 24 | 0.9367 | 0.1378 | 14 | 0.9474 | 0.5209 | 20 | 0.9779 | | 0.9039 | | 13 | | 0.8969 | | | 0.1211 | | |
| Figure 5E: D2-cFOS overlap | 18 | 0.9018 | 0.0618 | 18 | 0.9457 | 0.3611 | 13 | 0.9631 | | 0.8010 | | 14 | | 0.9741 | | | 0.9259 | | |

**Supplementary Figure 3.** A) Average THC+CBD SA and extinction over time shows no difference between males and females (2-way ANOVA F(19,988)=0.876, p=0.616. B) Similar average Infusion rates in male and female rats. C) Similar Discrimination index (= [*active lever presses/inactive lever Presses*]/[*active lever presses+inactive lever presses*]; average over the last 3 days of SA) in male and female rats. D) Average Vehicle SA. Animals lost lever discrimination by day 8 of vehicle SA. E) Similar average infusion rates in Vehicle and THC+CBD rats. F) THC+CBD rats showed a higher discrimination index than vehicle Control rats (t(74)=2.119, p=0.038; unpaired t-test). Bar graphs show mean ± SEM. G) Average THC+CBD Infusion rates for all animals used for Spine analysis (1-way ANOVA F(3,19)= .4433, p=0.7261). H) Average THC+CBD infusion rates for all animals used for sEPSC analysis (1-way ANOVA F(3,19)= 2.413, p=0.094). I) Average THC+CBD Infusion rates for all animals used for WIN55,212-2 experiment (unpaired t-test t(9)=1.982, p=0.079. J) Average THC+CBD Infusion rates for all animals used for LFS-pairing plasticity experiment (1-way ANOVA F(3,19)= 2.021, p=0.145).

**Supplementary Figure 4**. Bar graphs comparing sEPSP amplitude and IEI at baseline and 15-25 minutes after plasticity induction. A) Vehicle controls show no significant change in either parameter, reflecting the lack of long-term plasticity in Figure 3D. B) The LTP in THC+CBD extinguished animals LTD was accompanied by a decrease in sEPSC IEI, indicating a presynaptic locus of LTP. C) Cue-Reinstated animals showed no significant change in either parameter.

**Supplementary Figure 5.** Synaptic plasticity in response to the LFS-pairing protocol for Long-Evans wild-type littermates and pooled data from D1-MSNs (Figure 4D) and D2-MSNs (Figure 5D). The average time course of LTD for Sprague Dawley rats (Figure 3A from (Neuhofer *et al.* 2019)) is indicated as line. The time course of synaptic response to plasticity induction protocol revealed no difference between MSNS from Long-Evans wild-type littermates and pooled data from D1-MSN and D2-MSNs from transgenic rats. (interaction F(33, 510)=0.5151, P=0.9902, time F(6.489, 194.6) = 11.26, p<0.001; strains F(2,30) =3.540, p=0.0417; LE wild-type vs. D1+D2-MSN P=0.3334, LE wild-type vs. Sprague Dawley P<0.001, 2-way ANOVA for time course of current response after plasticity induction with Holm-Sidak post-hoc test).
